# Supplementary material for: Cell-free DNA copy number variations predict efficacy of immune checkpoint inhibitor-based therapy in hepatobiliary cancers
Source: PubMed Central journal article supplement (PMC8112417; doi:10.1136/jitc-2020-001942), 2021-05-10
Supplement: jitc-2020-001942supp002.pdf [file jitc-2020-001942supp002.pdf]

**Supplementary Table 1. Other clinical characteristics of patients with hepatobiliary cancer**

(N = 187)

| Variable                                | ICI cohort 1<br>(N=43) | ICI Cohort2<br>(N=108) | Non-ICI Cohort<br>(N=36) |
|-----------------------------------------|------------------------|------------------------|--------------------------|
| <b>Etiology — no. (%)</b>               |                        |                        |                          |
| Hepatitis B                             | 17(39.5)               | 46(42.6)               | 10(27.8)                 |
| Hepatitis C                             | 0(0)                   | 3(2.8)                 | 2(5.6)                   |
| NAFLD                                   | 2(4.7)                 | 6(5.6)                 | 1(2.8)                   |
| AFLD                                    | 3(7.0)                 | 4(3.7)                 | 1(2.8)                   |
| Alcohol use                             | 3(7.0)                 | 8(7.4)                 | 1(2.8)                   |
| Others                                  | 24(55.8)               | 53(49.0)               | 23(63.8)                 |
| <b>Biliary stone — no. (%)</b>          |                        |                        |                          |
| Y                                       | 9(20.9)                | 27(25.0)               | 8(22.2)                  |
| N                                       | 32(74.4)               | 78(72.2)               | 24(66.7)                 |
| NA                                      | 2(4.7)                 | 3(2.8)                 | 4(11.1)                  |
| <b>Macrovascular Invasion — no. (%)</b> |                        |                        |                          |
| Y                                       | 6(14.0)                | 26(24.1)               | 3(8.3)                   |
| N                                       | 37(86.0)               | 82(75.9)               | 33(91.7)                 |
| <b>TNM Stage — no. (%)</b>              |                        |                        |                          |
| I                                       | 0 (37.2)               | 2 (1.9)                | 4(11.1)                  |
| II                                      | 6(14.0)                | 9(8.3)                 | 5(13.9)                  |
| III                                     | 10(23.3)               | 32(29.6)               | 10(27.8)                 |
| IV                                      | 27(62.8)               | 65(60.2)               | 17(47.2)                 |
| <b>Distant metastasis — no. (%)</b>     |                        |                        |                          |
| Y                                       | 23(53.5)               | 50(46.3)               | 15(41.7)                 |
| N                                       | 20(46.5)               | 58(53.7)               | 21(58.3)                 |
| <b>ALBI score — no. (%)</b>             |                        |                        |                          |
| 1                                       | 30(69.8)               | 72(66.7)               | 21(58.3)                 |
| 2                                       | 13(30.2)               | 33(30.6)               | 12(33.3)                 |
| 3                                       | 0(0.0)                 | 3(2.8)                 | 3(8.3)                   |
| <b>AFP&gt;400ng/ml — no. (%)</b>        |                        |                        |                          |
| Y                                       | 3(7.0)                 | 16(14.8)               | 4(11.1)                  |
| N                                       | 39(90.7)               | 88(81.5)               | 32(88.9)                 |
| NA                                      | 1(2.3)                 | 4(3.7)                 | 0(0.0)                   |
| <b>CA19-9&gt;100U/L — no. (%)</b>       |                        |                        |                          |
| Y                                       | 18(41.9)               | 42(38.9)               | 11(30.6)                 |
| N                                       | 24(55.8)               | 63(58.3)               | 25(69.4)                 |
| NA                                      | 1(2.3)                 | 3(2.8)                 | 0(0.0)                   |
| <b>Maximum tumor diameter — no. (%)</b> |                        |                        |                          |
| >=5 cm                                  | 25(58.1)               | 54(50.0)               | 11(30.6)                 |

| Variable                                         | ICI cohort 1<br>(N=43) | ICI Cohort2<br>(N=108) | Non-ICI Cohort<br>(N=36) |
|--------------------------------------------------|------------------------|------------------------|--------------------------|
| <5 cm                                            | 18(41.9)               | 54(50.0)               | 25(69.4)                 |
| <b>Histological Grade — no. (%)</b>              |                        |                        |                          |
| <b>Poorly differentiated (G3/G4)</b>             | 14(32.6)               | 40(37.0)               | 9(25.0)                  |
| <b>Moderately or well differentiated (G1/G2)</b> | 13(30.2)               | 34(31.5)               | 12(33.3)                 |
| NA                                               | 16(37.2)               | 34(31.5)               | 15(41.7)                 |
| <b>PD-L1 expression — no. (%)</b>                |                        |                        |                          |
| TPS >=1%                                         | 4(9.3)                 | 15(13.9)               | 3(8.3)                   |
| TPS <1%                                          | 22(51.2)               | 39(36.1)               | 17(47.2)                 |
| NA                                               | 17(39.5)               | 54(50.0)               | 16(44.4)                 |
| <b>Best response rate — no. (%)</b>              |                        |                        |                          |
| PR                                               | 6(14.0)                | 18(16.7)               | 3(8.3)                   |
| SD                                               | 18(41.9)               | 62(57.4)               | 14(38.9)                 |
| PD                                               | 16(37.1)               | 24(22.2)               | 3(8.3)                   |
| NA                                               | 3(7.0)                 | 4(3.7)                 | 16(44.4)                 |
| <b>Clinical benefit — no. (%)</b>                |                        |                        |                          |
| DCB                                              | 13(30.2)               | 54(50.0)               | 11(30.6)                 |
| NCB                                              | 30(69.8)               | 51(47.2)               | 10(27.8)                 |
| NA                                               | 0(0.0)                 | 3(2.8)                 | 15(41.7)                 |
| <b>PFS — Median (95%CI) month</b>                |                        |                        |                          |
| PFS-All                                          | 4.16(2.84-5.47)        | 4.13(2.14-6.13)        | 6.03(3.87-8.17)          |
| PFS-HCC                                          | 10.73(1.62-19.84)      | 6.63(3.77-9.49)        | 6.03(3.53-8.54)          |
| PFS-BTC                                          | 3.06(1.26-4.88)        | 3.5(3.00-4.01)         | 4.93(3.54-6.32)          |
| PFS-CHCC                                         | 2.66(2.51-2.83)        | NA                     | NA                       |
| <b>OS — Median (95%CI) month</b>                 |                        |                        |                          |
| OS-All                                           | 13.53(8.10-19.0)       | 12.73(9.23-16.24)      | 10.07(6.96-13.17)        |
| OS-HCC                                           | NR                     | 17.43(8.06-26.81)      | 8.33(7.79-8.88)          |
| OS -BTC                                          | 10.13(6.56-13.71)      | 12.03(8.78-15.28)      | 9.79(3.51-41.96)         |
| OS -CHCC                                         | NA                     | NA                     | NA                       |

Abbreviations: OS: overall survival, PFS: progression-free survival, CI: confidence interval, PR: partial response, SD: stable disease, PD: progressive disease, DCB: durable clinical benefit, NCB: no clinical benefit, NA: not available ,NR: not reach, NAFLD: Non-alcoholic fatty liver disease, AFLD: alcoholic fatty liver disease
