# Supplementary material for: Cell-free DNA copy number variations predict efficacy of immune checkpoint inhibitor-based therapy in hepatobiliary cancers
Source: PubMed Central journal article supplement (PMC8112417; doi:10.1136/jitc-2020-001942), 2021-05-10
Supplement: jitc-2020-001942supp003.pdf [file jitc-2020-001942supp003.pdf]

SNV Heatmap

Figure S1

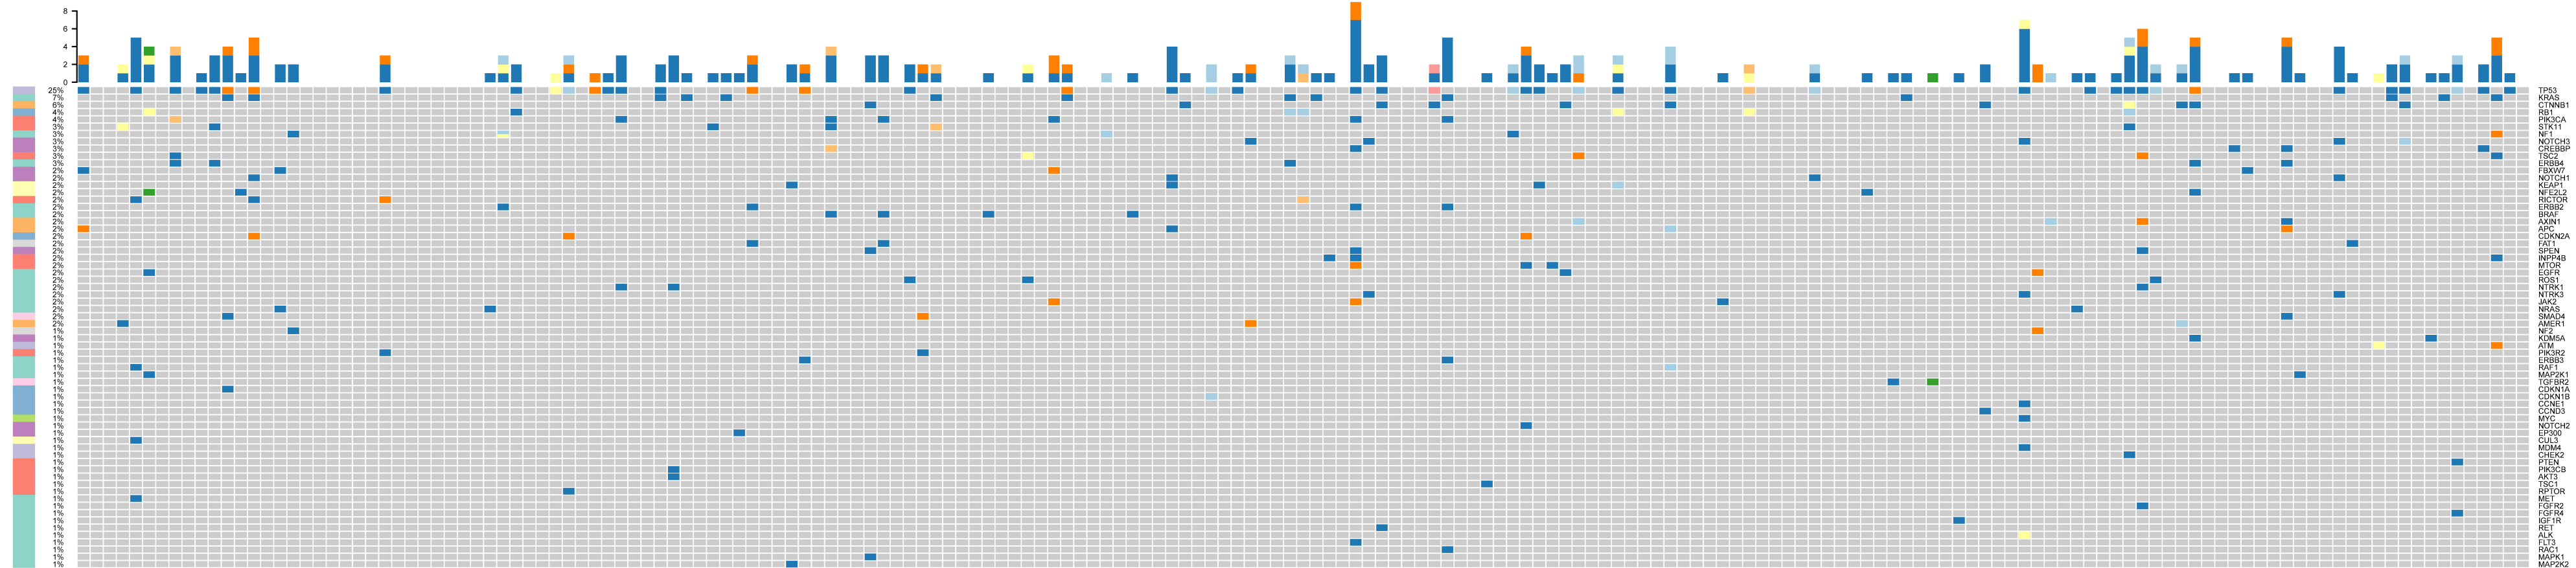

|                    |                            |                |                      |            |                    |            |                 |            |             |                  |              |
|--------------------|----------------------------|----------------|----------------------|------------|--------------------|------------|-----------------|------------|-------------|------------------|--------------|
| <b>pathway</b>     | <b>Mutation type</b>       | <b>Cohort</b>  | <b>Best_response</b> | <b>Sex</b> | <b>Cancer_type</b> | <b>TPS</b> | <b>Etiology</b> | <b>FLD</b> | <b>ECOG</b> | <b>ChildPuge</b> | <b>Stage</b> |
| RTK_RAS_pathway    | nonsynonymous_SNV          | ICI cohort 2   | SD                   | Male       | HCC                | Unknow     | HBV             | N          | 0           | A                | Stage III    |
| Nrf2_pathway       | frameshift_deletion        | ICI cohort 1   | PD                   | Female     | ICC                | >=1%       | N               | NAFLD      | 1           | B                | Stage II     |
| p53_pathway        | nonframeshift_deletion     | Non-ICI cohort | PR                   |            | ECC                | <1%        | Unknow          | AFLD       | 2           | C                | Stage IV     |
| PI3K_pathway       | frameshift_insertion       |                | Unknow               |            | CHCC               |            | HCV             |            |             |                  | Stage I      |
| Cell_cycle_pathway | nonframeshift_substitution |                |                      |            | GBC                |            |                 |            |             |                  |              |
| Wnt_pathway        | stopgain                   |                |                      |            |                    |            |                 |            |             |                  |              |
| Myc_pathway        | splicing                   |                |                      |            |                    |            |                 |            |             |                  |              |
| TGFbeta_pathway    |                            |                |                      |            |                    |            |                 |            |             |                  |              |
| Hippo_pathway      |                            |                |                      |            |                    |            |                 |            |             |                  |              |
| Notch_pathway      |                            |                |                      |            |                    |            |                 |            |             |                  |              |
