# Supplementary material for: Cell-free DNA copy number variations predict efficacy of immune checkpoint inhibitor-based therapy in hepatobiliary cancers
Source: PubMed Central journal article supplement (PMC8112417; doi:10.1136/jitc-2020-001942), 2021-05-10

**A****Figure S5**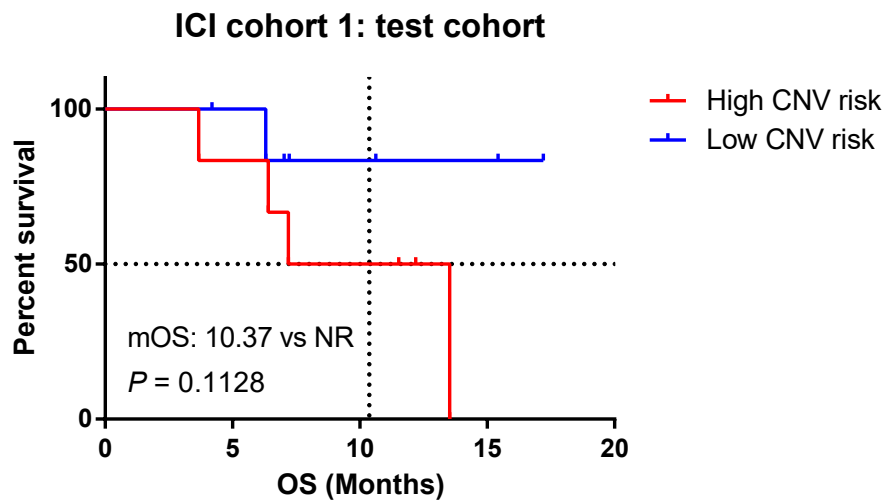**B**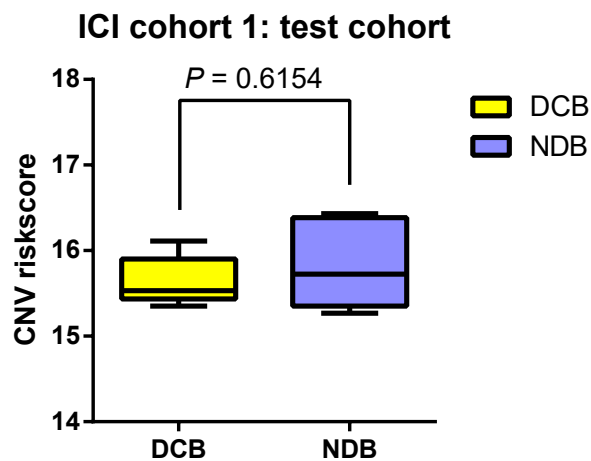**C**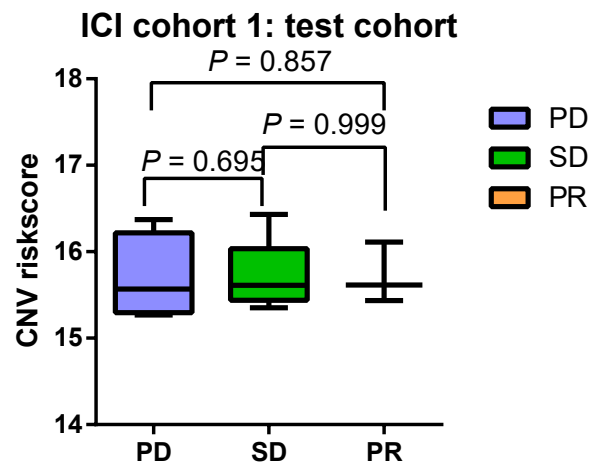

Supplement: jitc-2020-001942supp006.pdf [file jitc-2020-001942supp006.pdf]
