# Supplementary material for: Cell-free DNA copy number variations predict efficacy of immune checkpoint inhibitor-based therapy in hepatobiliary cancers
Source: PubMed Central journal article supplement (PMC8112417; doi:10.1136/jitc-2020-001942), 2021-05-10
Supplement: jitc-2020-001942supp007.pdf [file jitc-2020-001942supp007.pdf]

**Supplementary Table 2. The correction between CNV risk score with clinicopathological characteristics**

| Variable                      | Category                          | High-risk<br>(N=71) | Low-risk<br>(N=80) | P value<br>(Fisher's exact test) |
|-------------------------------|-----------------------------------|---------------------|--------------------|----------------------------------|
| <b>Sex</b>                    | Female                            | 28 (39.4)           | 25 (47.2)          | 0.310                            |
|                               | Male                              | 43 (60.6)           | 55 (56.1)          |                                  |
| <b>Age</b>                    | <60                               | 34 (47.9)           | 39 (48.8)          | 1                                |
|                               | >=60                              | 37 (52.1)           | 41 (51.2)          |                                  |
| <b>Histological Type</b>      | BTC                               | 52 (73.2)           | 39 (48.8)          | <b>0.004</b>                     |
|                               | CHCC                              | 2 (2.8)             | 2 (2.6)            |                                  |
|                               | HCC                               | 17 (23.9)           | 39 (48.8)          |                                  |
| <b>Histological Grade</b>     | Moderately or well differentiated | 42 (59.2)           | 55 (68.8)          | 0.238                            |
|                               | Poorly differentiated             | 29 (40.8)           | 25 (31.3)          |                                  |
| <b>Macrovascular Invasion</b> | N                                 | 54 (76.1)           | 65 (81.3)          | 0.550                            |
|                               | Y                                 | 17 (23.9)           | 15 (18.8)          |                                  |
| <b>TNM Stage</b>              | I-III                             | 30 (42.3)           | 29 (36.3)          | 0.505                            |
|                               | IV                                | 41 (57.7)           | 51 (63.7)          |                                  |
| <b>Tumor burden score</b>     | <8                                | 37 (52.1)           | 57 (71.3)          | <b>0.019</b>                     |
|                               | >=8                               | 34 (47.9)           | 23 (28.7)          |                                  |
| <b>Maximum tumor diameter</b> | <5                                | 27 (38.0)           | 52 (65.0)          | <b>0.001</b>                     |
|                               | >=5                               | 44 (62.0)           | 28 (35.0)          |                                  |

Abbreviations: HCC: hepatocellular carcinoma, BTC: biliary tract cancer, CHCC: combined hepatocellular-cholangiocarcinoma, CNV: copy number variation
