# Supplementary material for: Cell-free DNA copy number variations predict efficacy of immune checkpoint inhibitor-based therapy in hepatobiliary cancers
Source: PubMed Central journal article supplement (PMC8112417; doi:10.1136/jitc-2020-001942), 2021-05-10

A

All ICI cohort combined

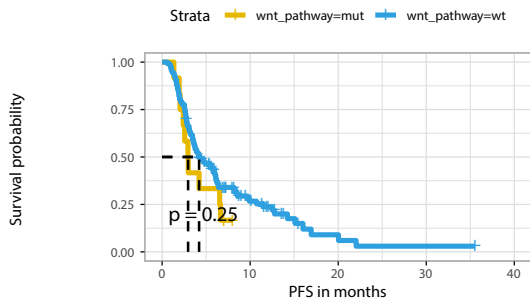

Number at risk

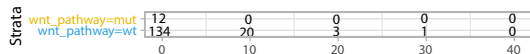

B

Non-ICI cohort

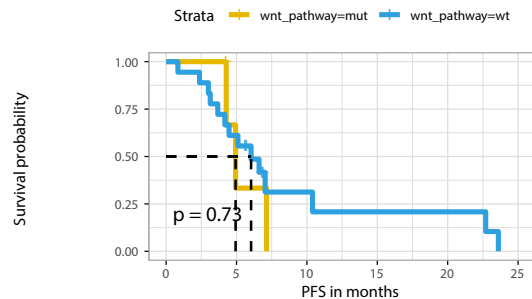

Number at risk

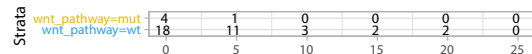

C

All ICI cohort combined: HCC

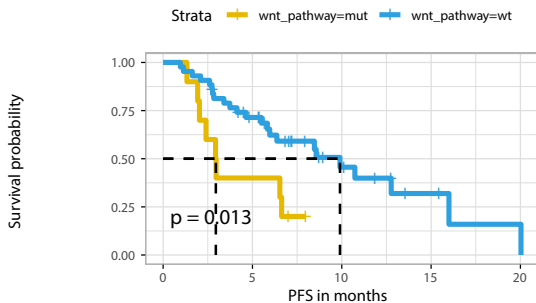

Number at risk

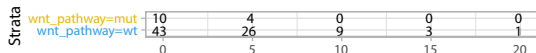

D

All ICI cohort combined: BTC

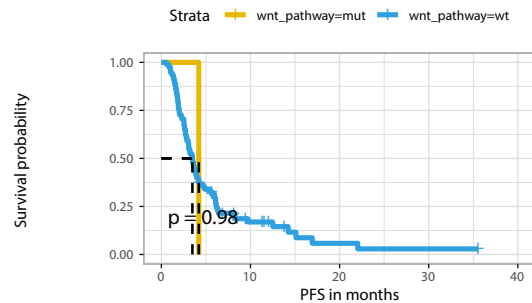

Number at risk

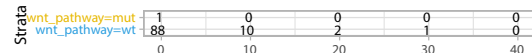

Supplement: jitc-2020-001942supp009.pdf [file jitc-2020-001942supp009.pdf]
